# Supplementary material for: A Comparison of Vaccine Hesitancy of COVID-19 Vaccination in China and the United States
Source: Vaccines (Basel). 2021 Jun 14;9(6):649. doi: 10.3390/vaccines9060649 (PMC8232230; doi:10.3390/vaccines9060649)
Supplement: Supplementary file 1 [file vaccines-09-00649-s001.zip › vaccines-1221885-supplementary.pdf]

## Supplementary information

### Table of Contents

|                                                                                                                                                           |    |
|-----------------------------------------------------------------------------------------------------------------------------------------------------------|----|
| Fig S1. COVID-19 vaccination acceptance comparison between China and the US depending on sex and age intervals after propensity score matching .....      | 2  |
| Fig S2. COVID-19 vaccination acceptance comparison between China and the US depending on education and annual income after propensity score matching..... | 3  |
| Fig S3. COVID-19 vaccination acceptance comparison between China and the US depending on occupation after propensity score matching .....                 | 4  |
| Fig S4. COVID-19 vaccination acceptance in China before propensity score matching .....                                                                   | 5  |
| Fig S5. COVID-19 vaccination acceptance in the US before propensity score matching .....                                                                  | 7  |
| Fig S6. COVID-19 vaccination preference comparison between China and the US depending on sex after propensity score matching .....                        | 9  |
| Table S1. Behavioral and psychological results.....                                                                                                       | 10 |
| Table S3. The Pearson Correlation matrix between the baseline characteristics and acceptance.....                                                         | 13 |

**Fig S1. COVID-19 vaccination acceptance comparison between China and the US depending on sex and age intervals after propensity score matching**

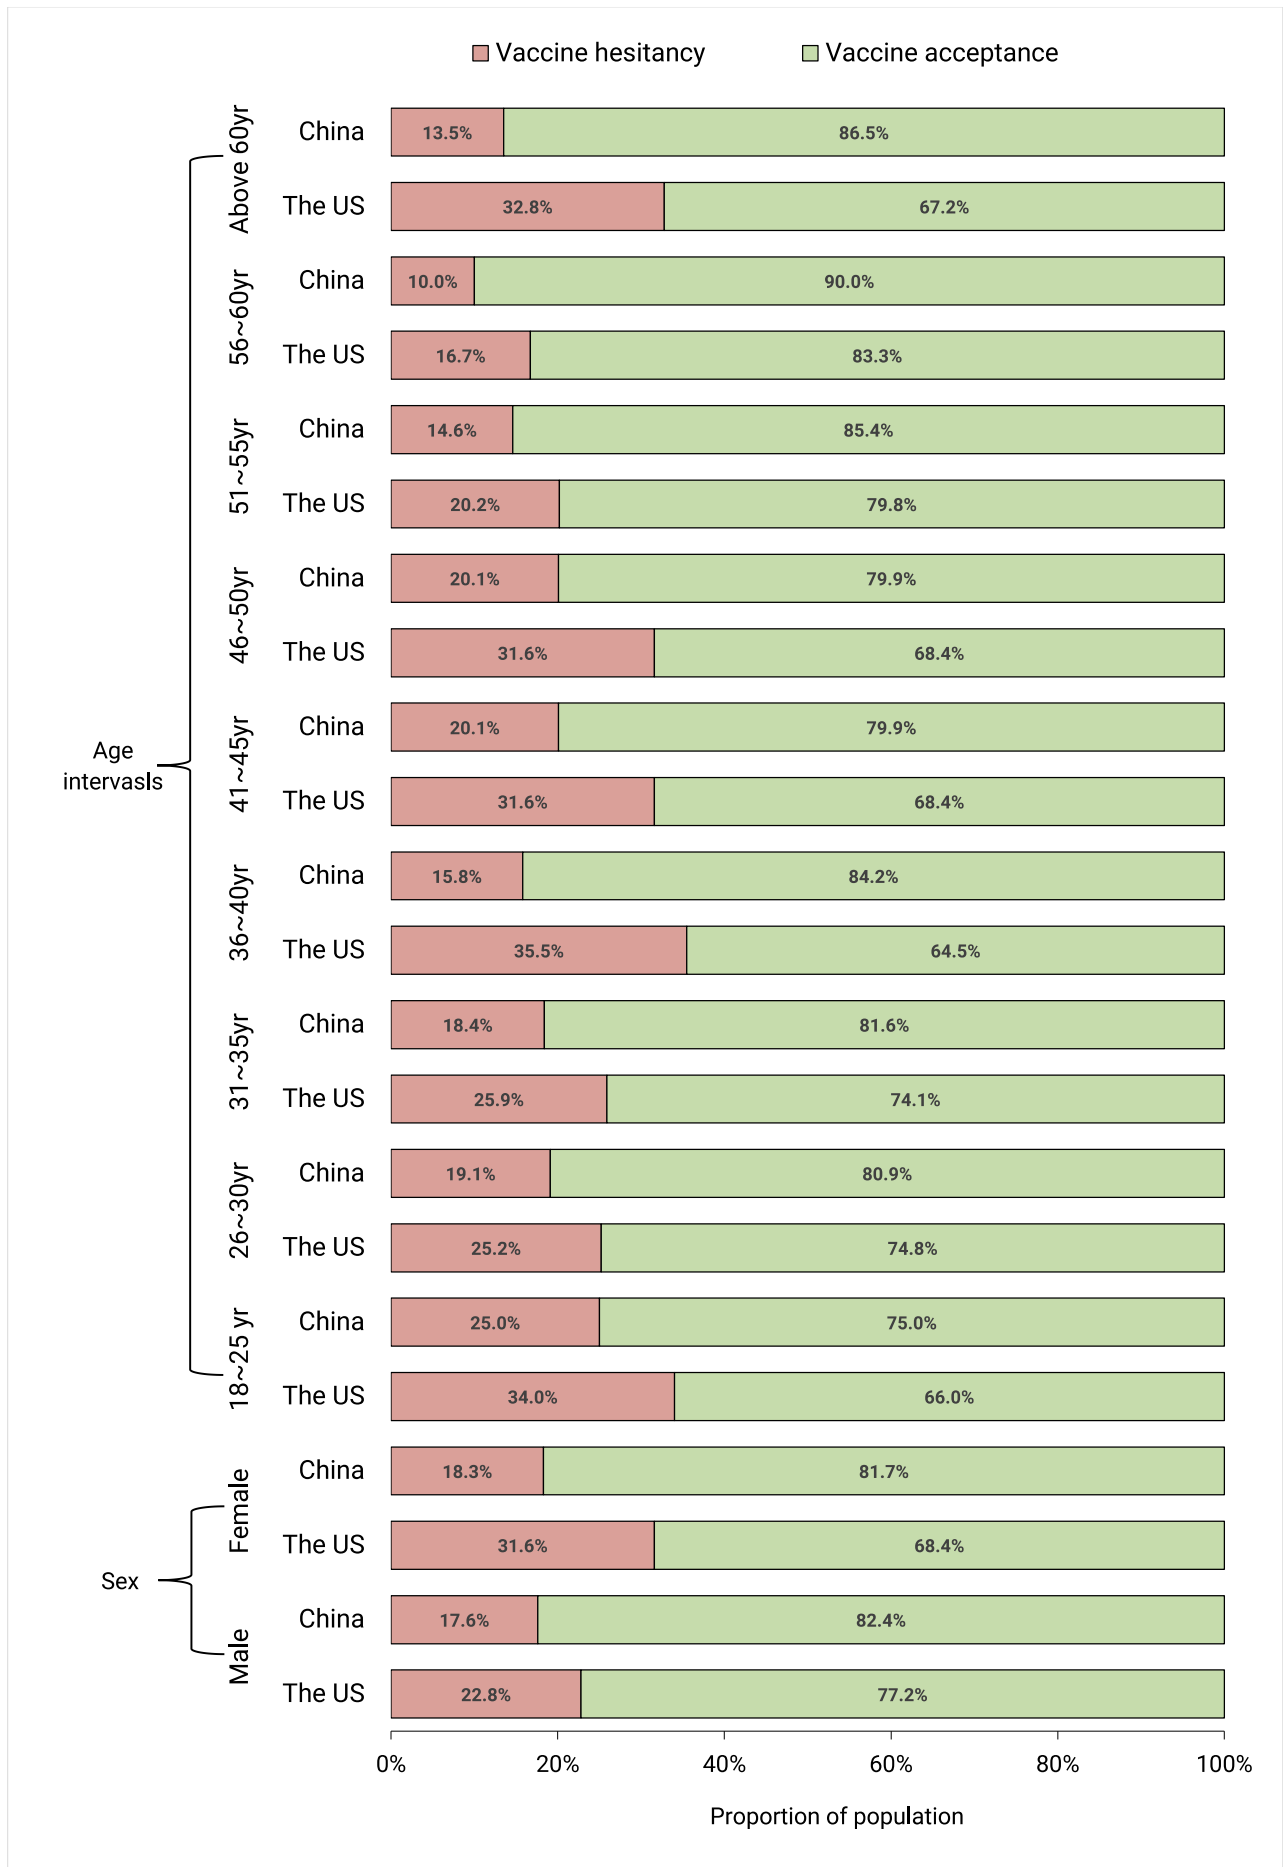

**Fig S2. COVID-19 vaccination acceptance comparison between China and the US depending on education and annual income after propensity score matching**

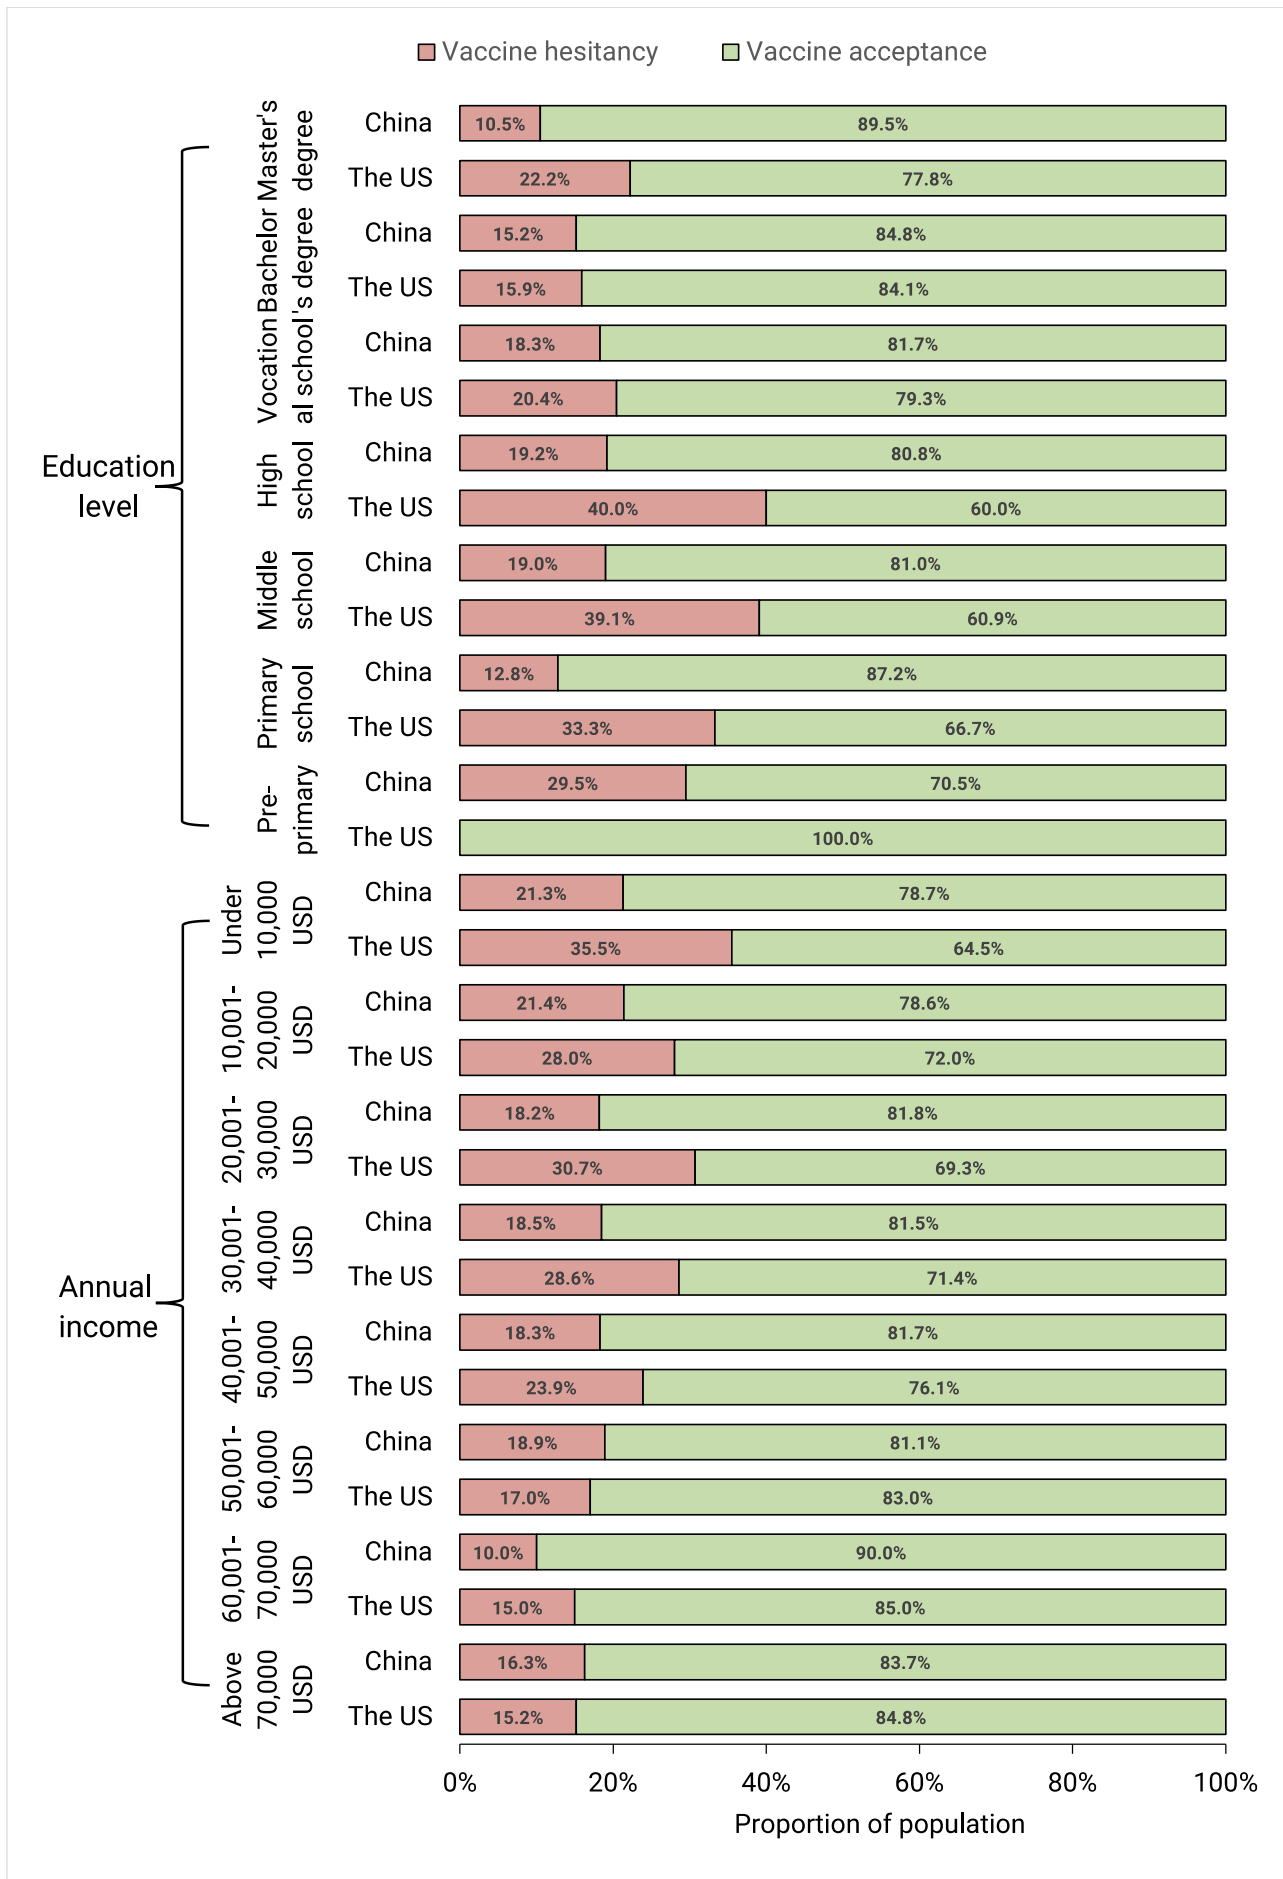

**Fig S3. COVID-19 vaccination acceptance comparison between China and the US depending on occupation after propensity score matching**

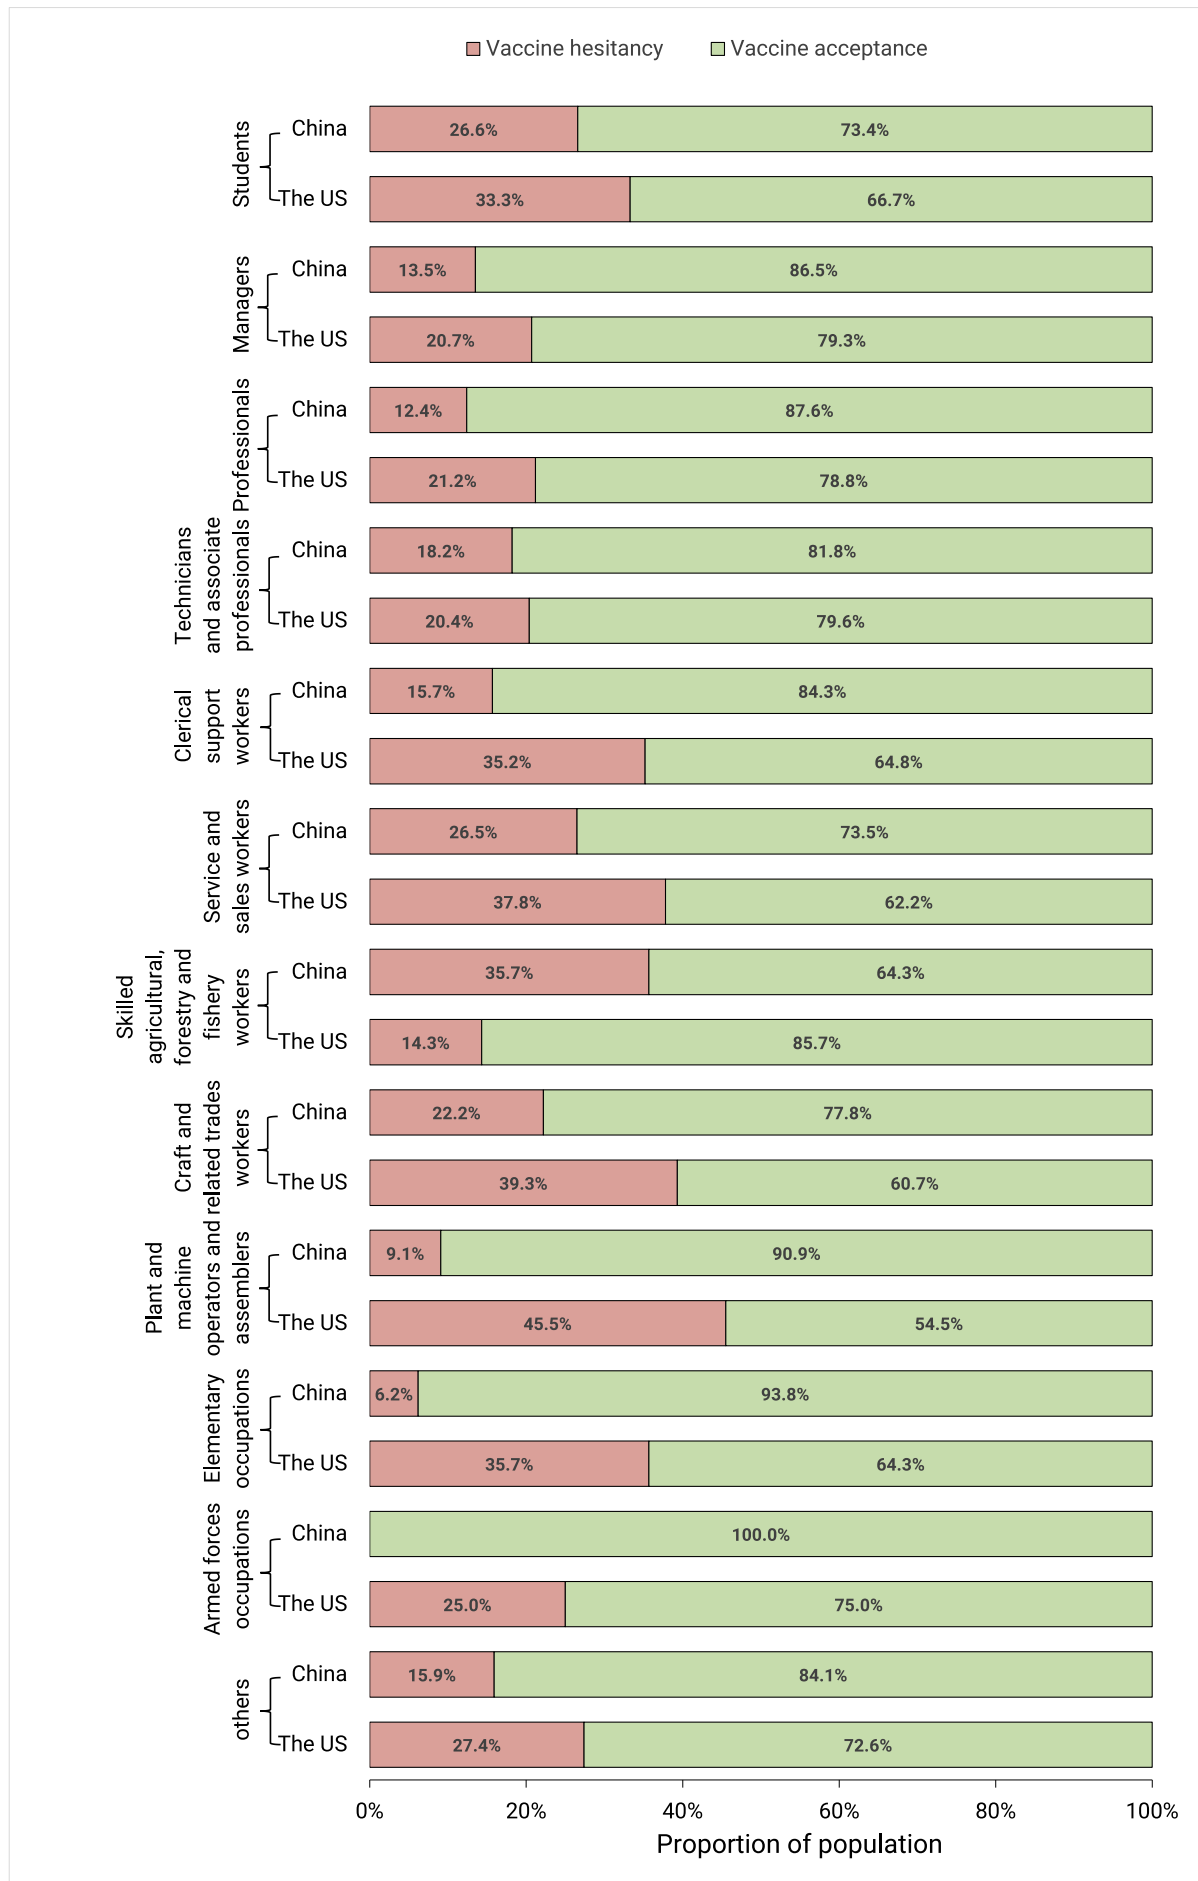

**Fig S4. COVID-19 vaccination acceptance in China before propensity score matching**

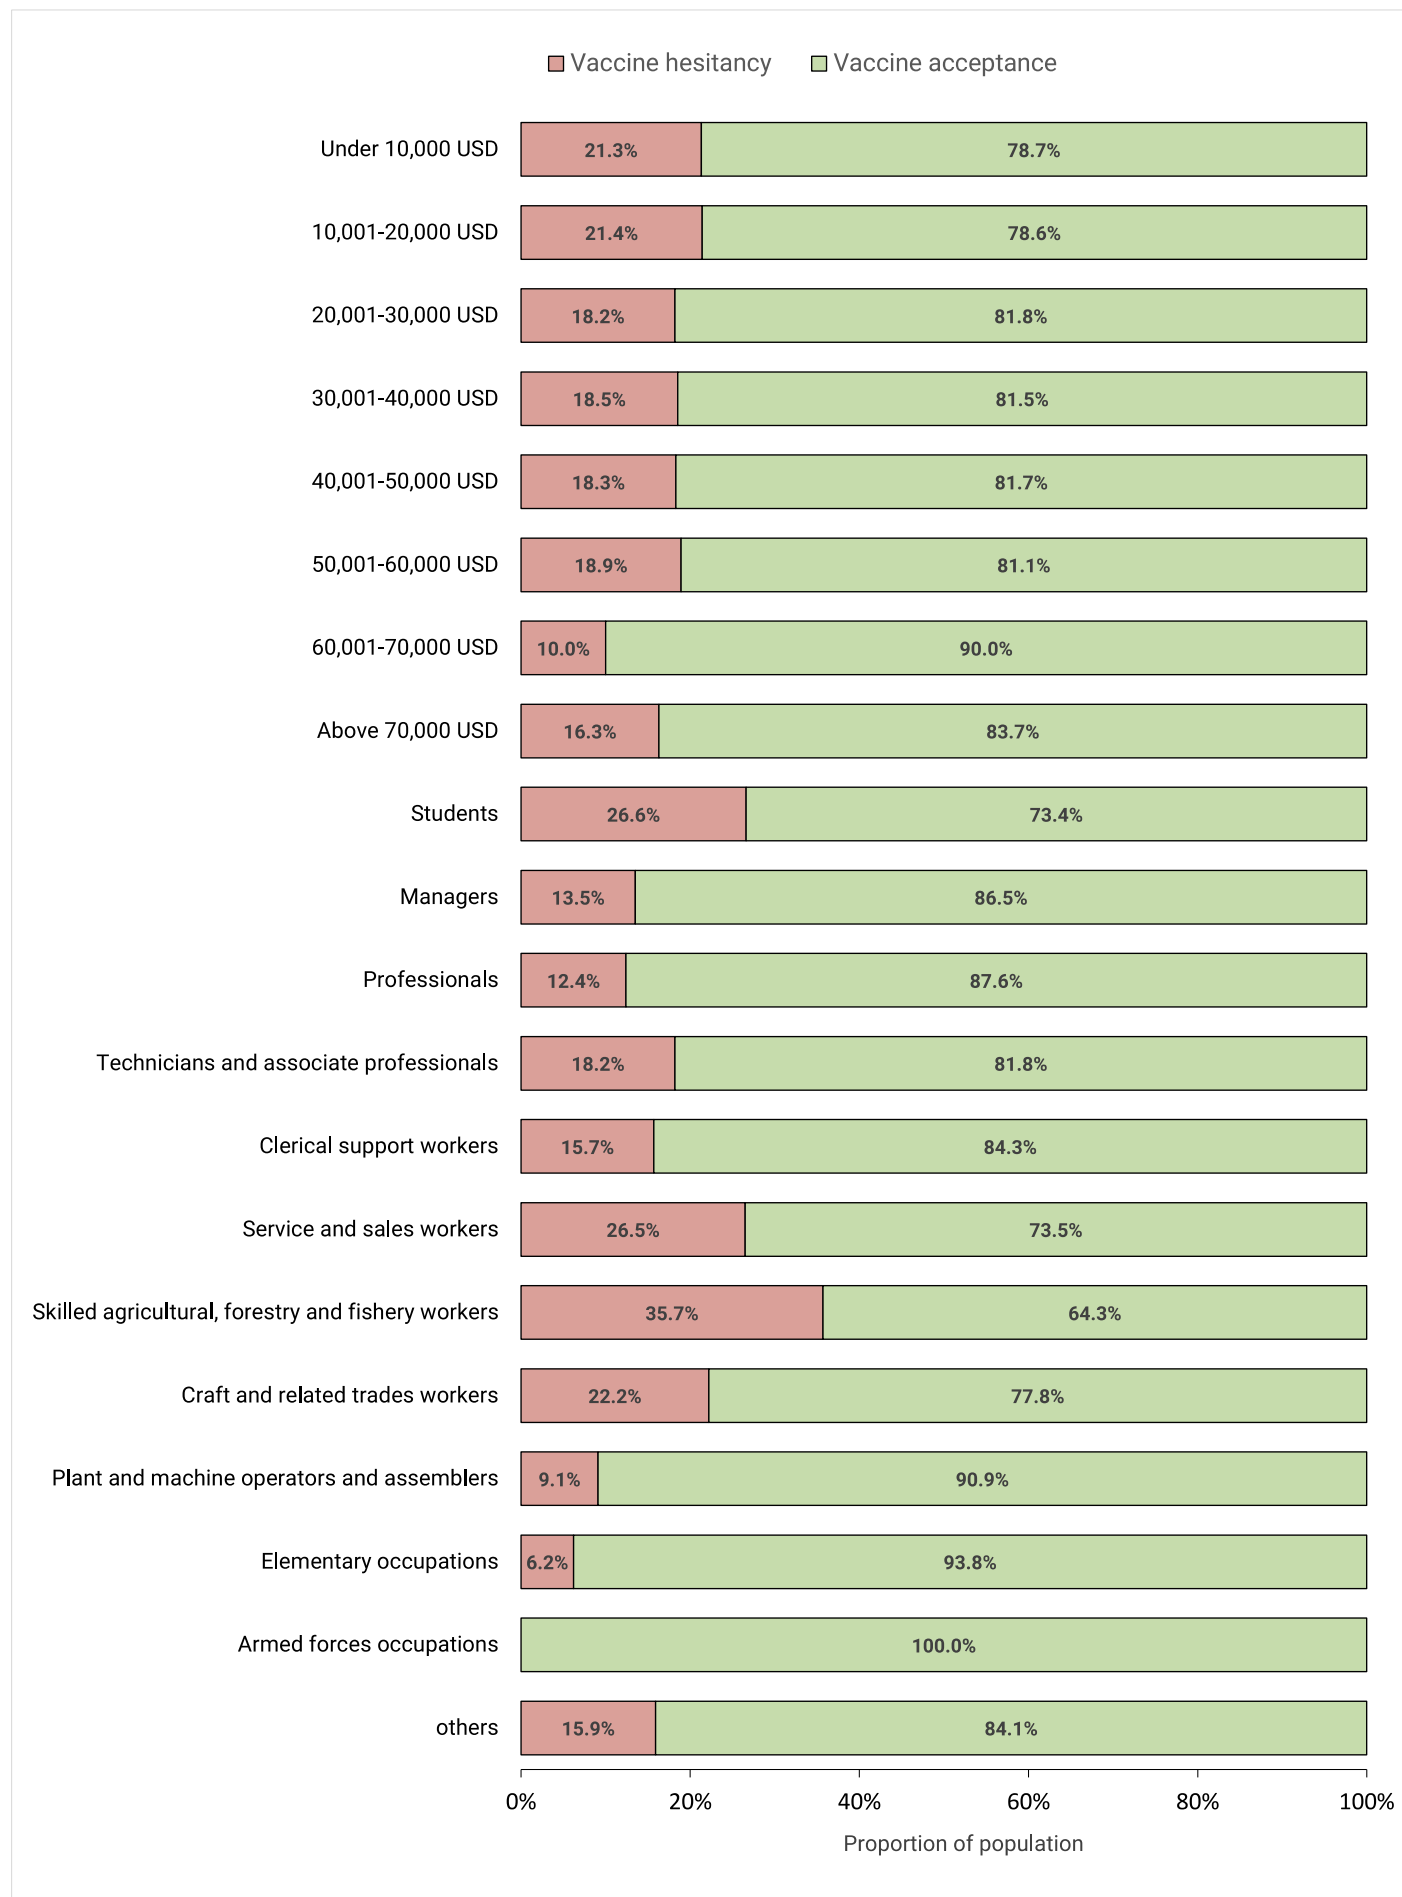

(continued)

■ Vaccine hesitancy ■ Vaccine acceptance

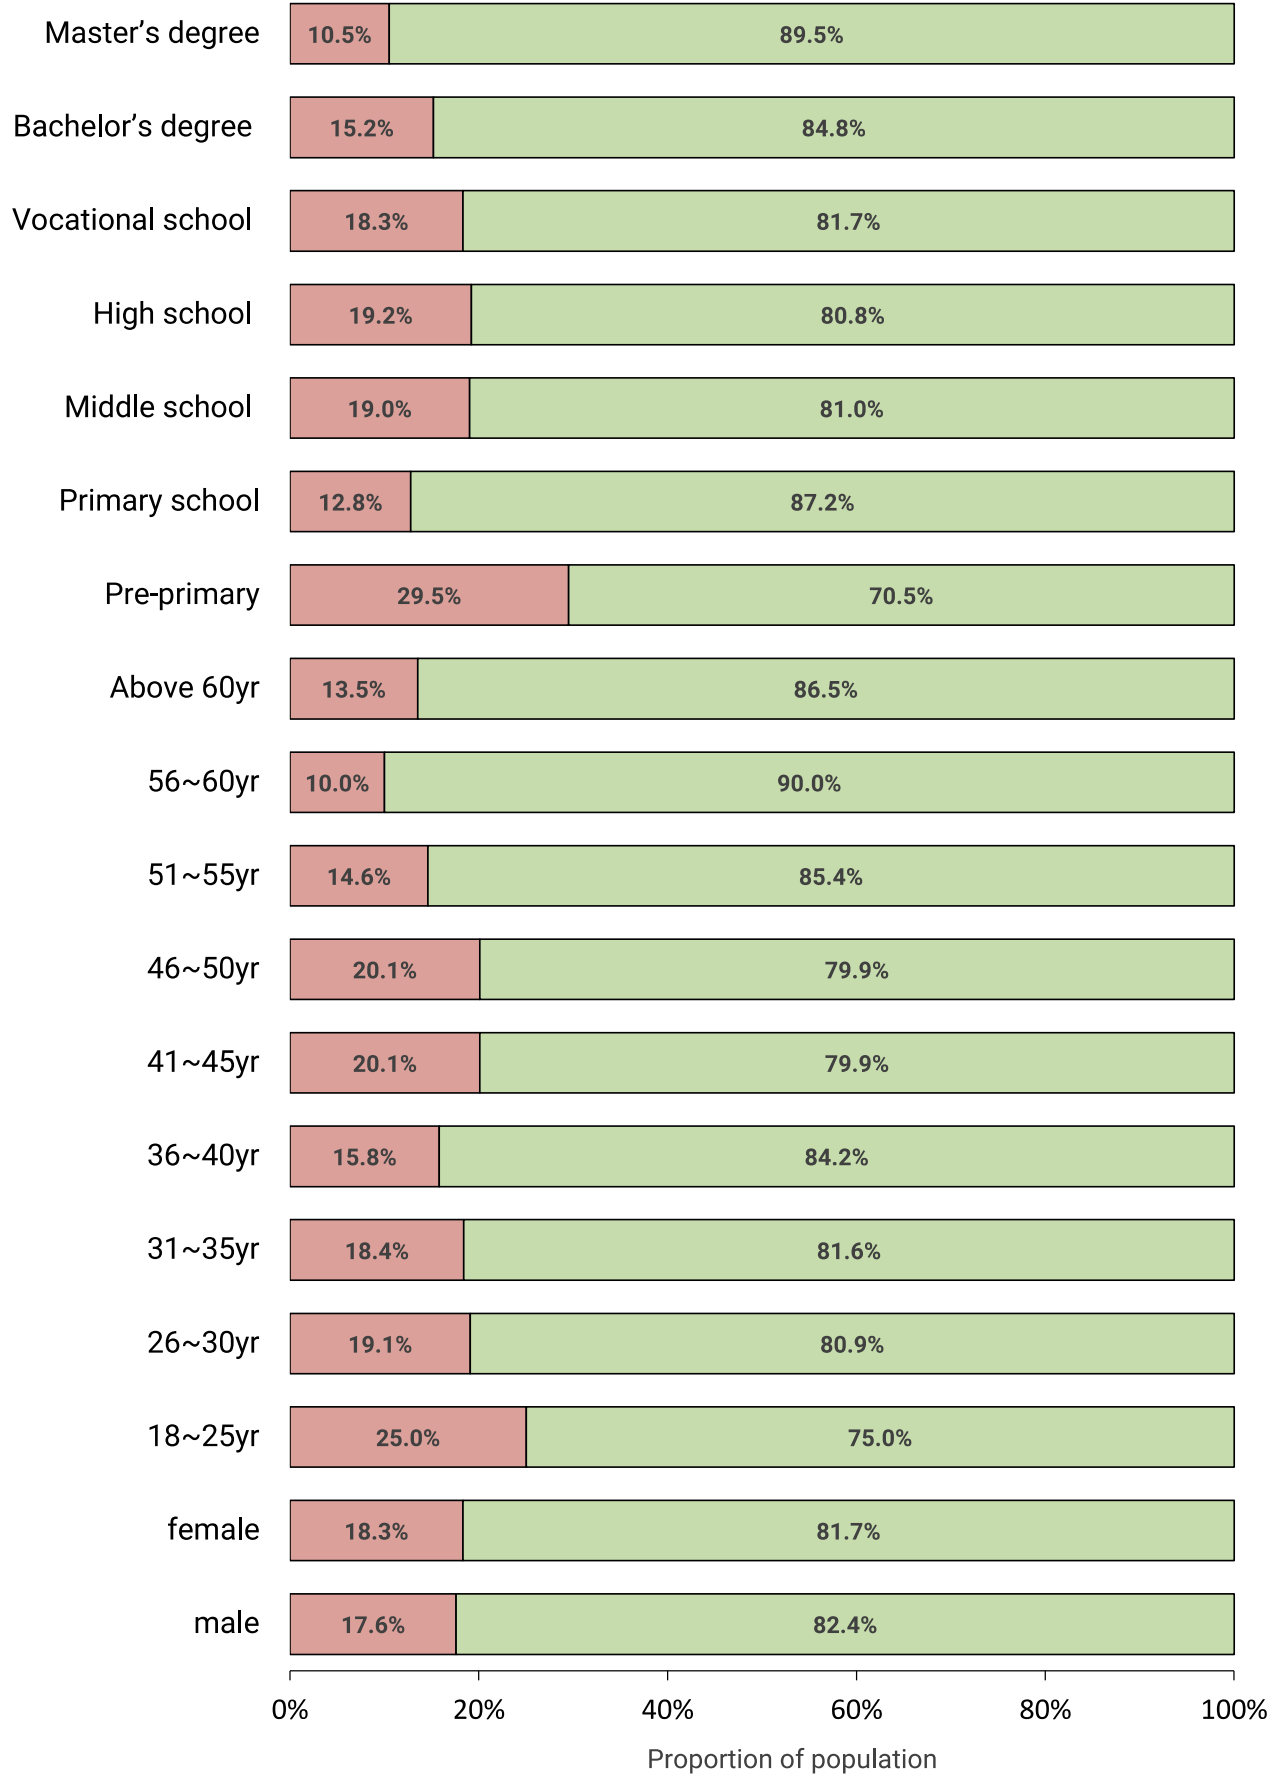

**Fig S5. COVID-19 vaccination acceptance in the US before propensity score matching**

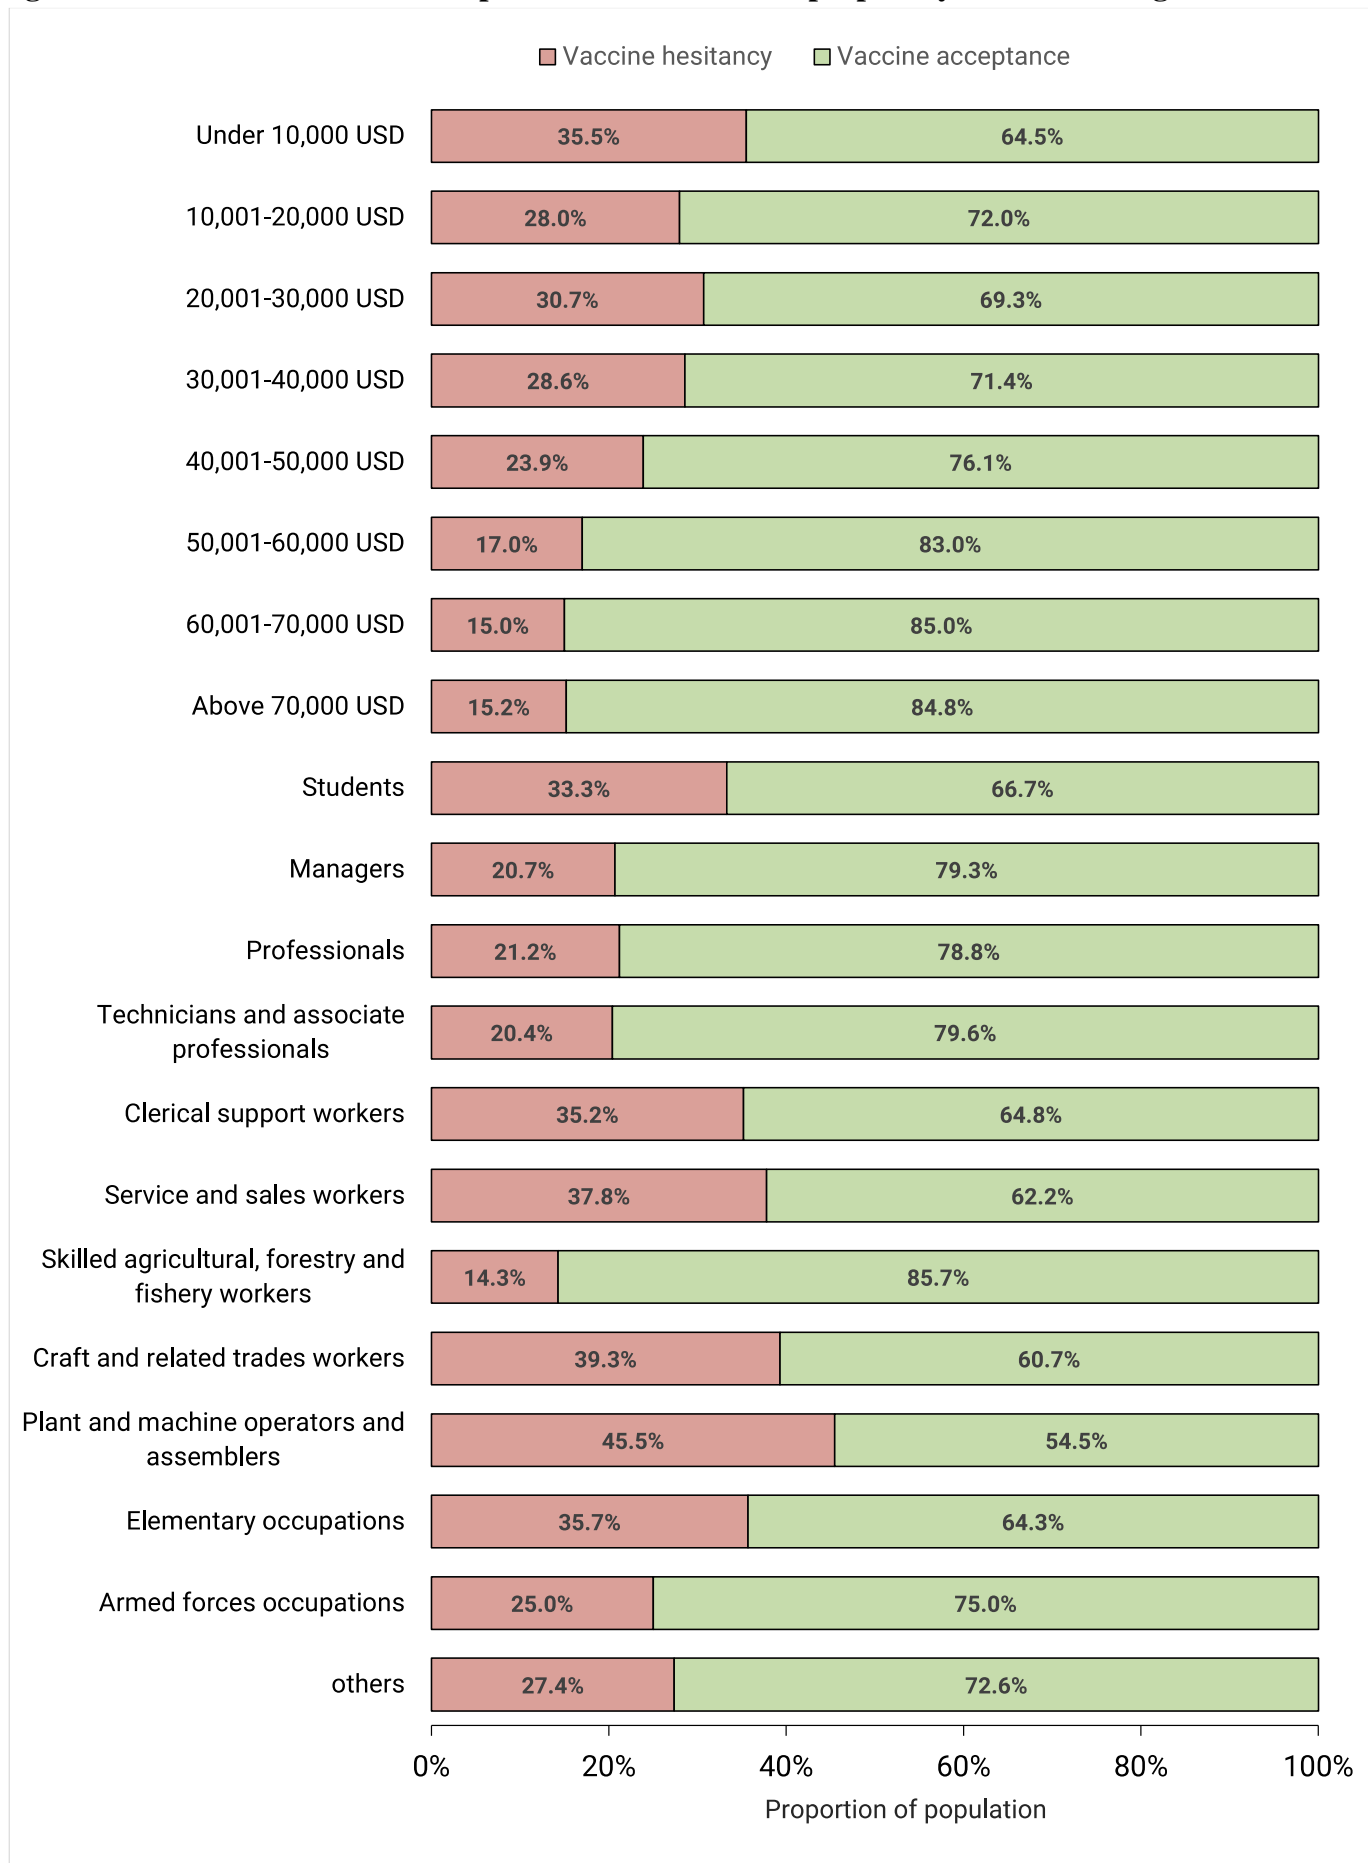

(Continued)

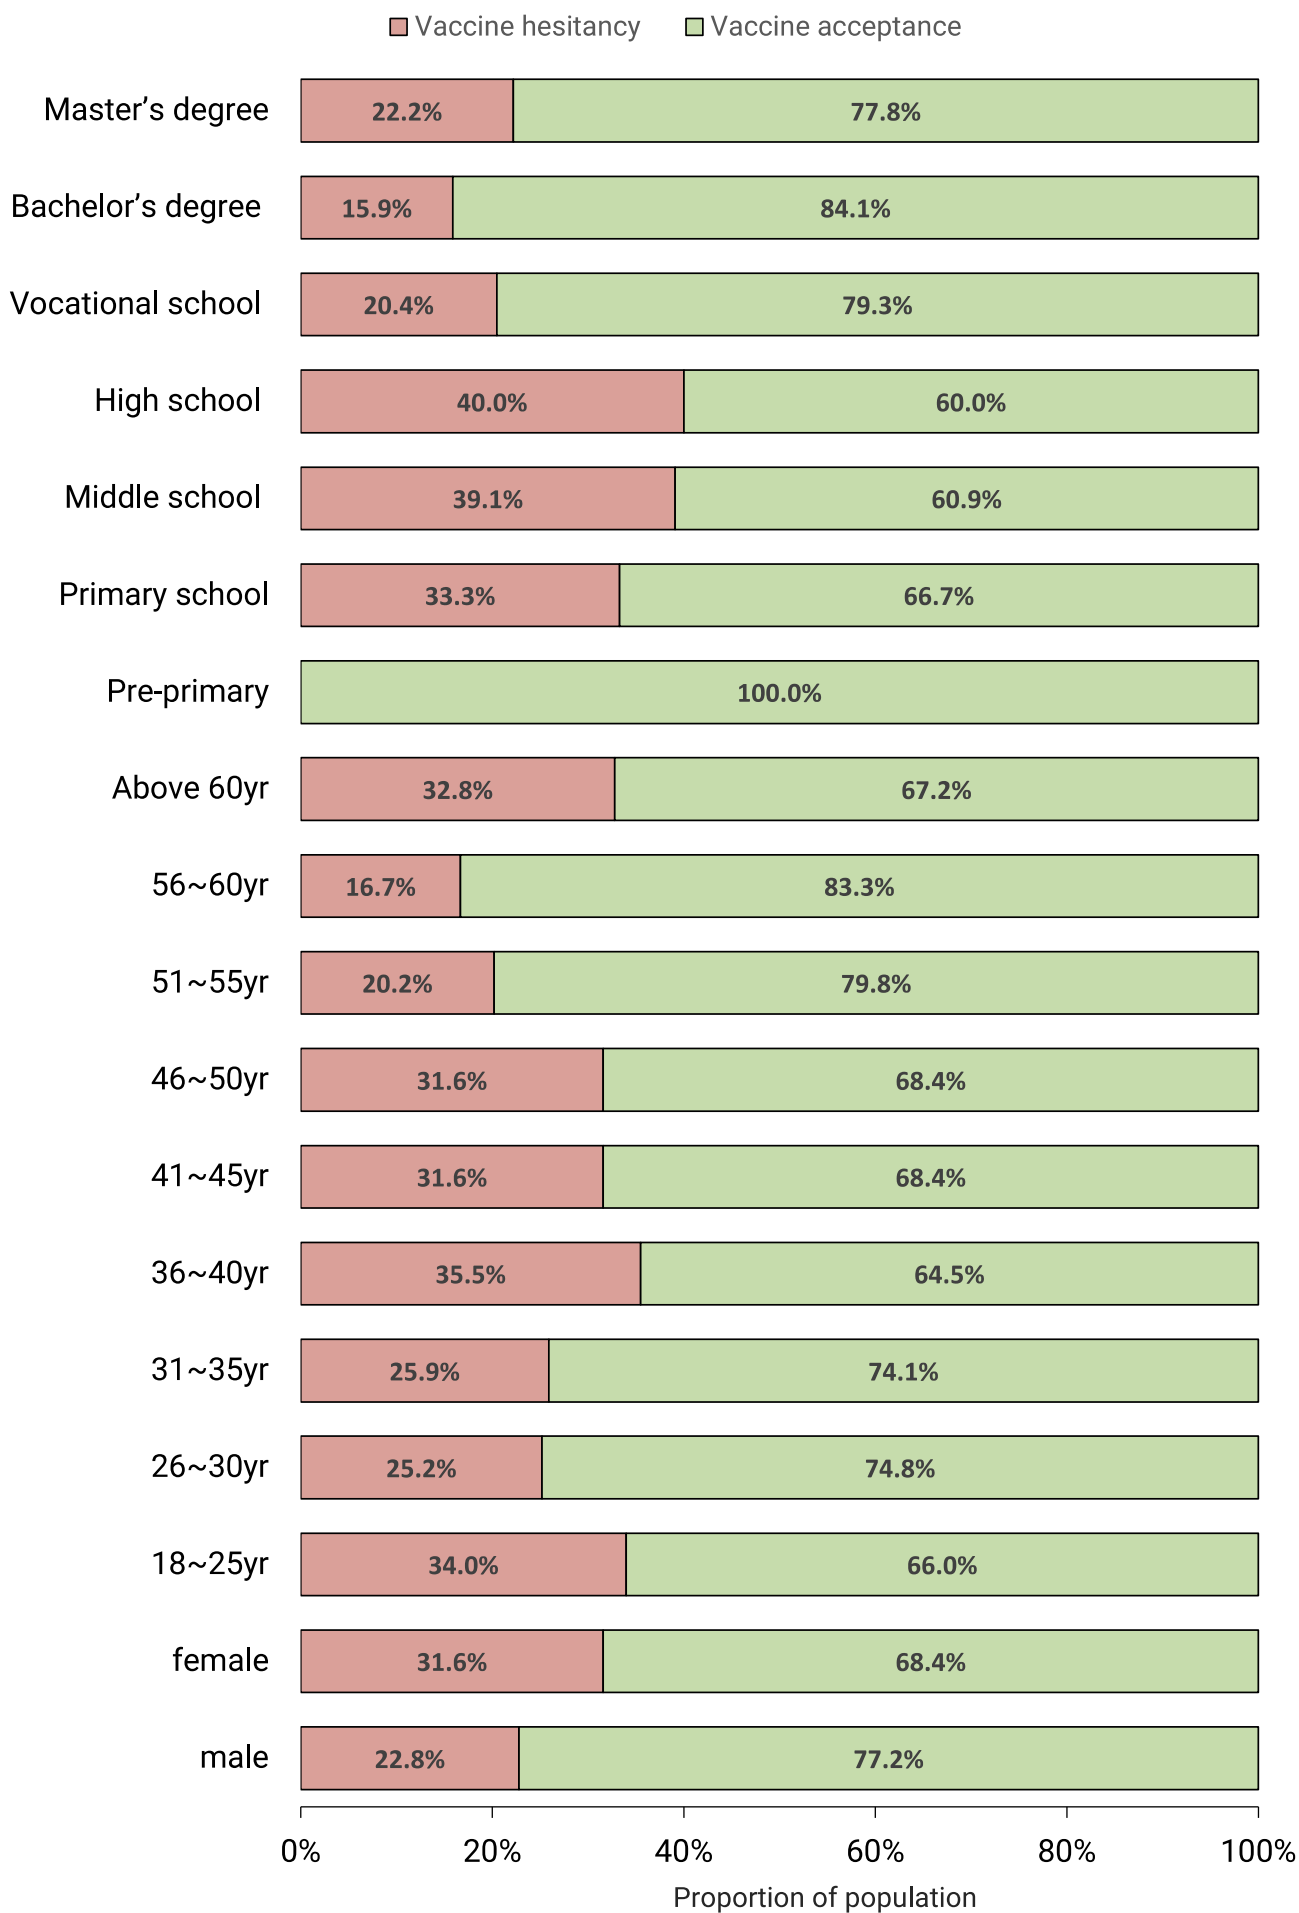

**Fig S6. COVID-19 vaccination preference comparison between China and the US depending on sex after propensity score matching**

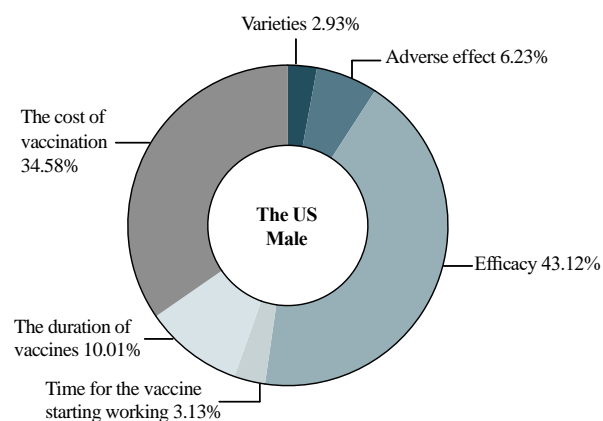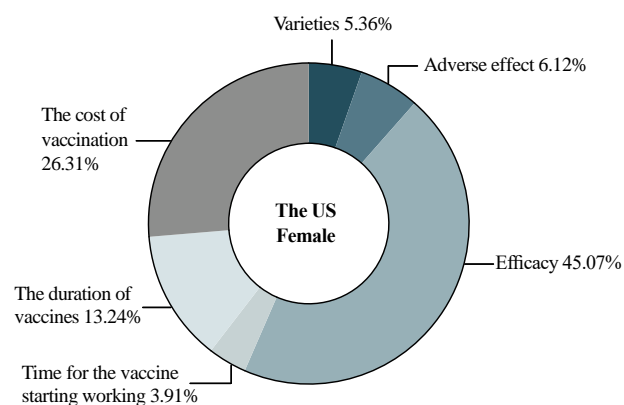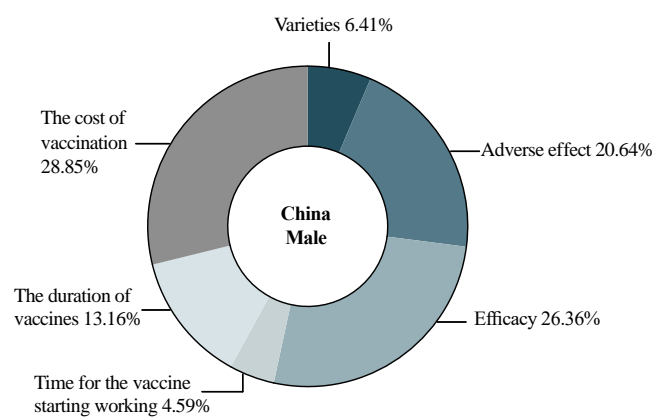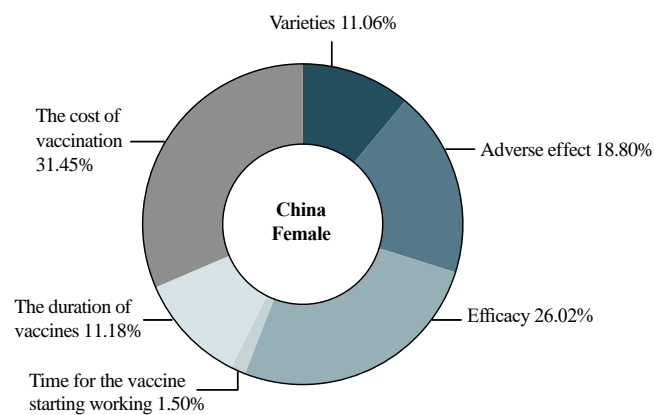

Table S1. Behavioral and psychological results

|                                                                                                             |     | Pre-PSM      |              |                | Post-PSM     |             |                |
|-------------------------------------------------------------------------------------------------------------|-----|--------------|--------------|----------------|--------------|-------------|----------------|
| Items                                                                                                       |     | China        | The US       | <i>P</i> value | China        | The US      | <i>P</i> value |
| <i>Past immunization behaviour/ adverse events</i>                                                          |     |              |              |                |              |             |                |
|                                                                                                             |     | (N=5374)     | (N=3701)     |                | (N=1240)     | (N=1240)    |                |
| “I have delayed getting a vaccine shot once (or more than once) for reasons other than illness or allergy.” | Yes | 567 (10.6%)  | 1246 (33.7%) | <0.001         | 152 (12.3%)  | 475 (38.3%) | <0.001         |
|                                                                                                             | No  | 4807 (89.4%) | 2455 (66.3%) |                | 1088 (87.7%) | 765 (61.7%) |                |
| "I have once decided not to get a shot of vaccine for reasons other than illness or allergy?"               | Yes | 528 (9.8%)   | 1273 (34.4%) | <0.001         | 124 (10.0%)  | 477 (38.5%) | <0.001         |
|                                                                                                             | No  | 4846 (90.2%) | 2428 (65.6%) |                | 1116 (90.0%) | 763 (61.5%) |                |
| “I have events in the past that discouraged me from getting a vaccine(s) for myself or my families?”        | Yes | 363 (6.8%)   | 1000 (27.0%) | <0.001         | 93 (7.5%)    | 375 (30.2%) | <0.001         |
|                                                                                                             | No  | 5011 (93.2%) | 2701 (73.0%) |                | 1147 (92.5%) | 865 (69.8%) |                |
| Did you ever experience an AEFI (adverse event following immunization)?                                     | Yes | 580 (10.8%)  | 752 (20.4%)  | <0.001         | 148 (12.0%)  | 252 (20.3%) | <0.001         |
|                                                                                                             | No  | 4776 (89.2%) | 2937 (79.6%) |                | 1089 (88.0%) | 987 (79.7%) |                |
| <i>Cues to action</i>                                                                                       |     |              |              |                |              |             |                |
| “I am recommended by a doctor to get COVID-19 vaccination.”                                                 | Yes | 1763 (32.8%) | 1968 (53.2%) | <0.001         | 395 (31.9%)  | 622 (50.2%) | <0.001         |
|                                                                                                             | No  | 3611 (67.2%) | 1733 (46.8%) |                | 845 (68.1%)  | 618 (49.8%) |                |
| “I am recommended by the local health board to get COVID-19 vaccination.”                                   | Yes | 1995 (37.1%) | 2312 (62.5%) | <0.001         | 444 (35.8%)  | 736 (59.4%) | <0.001         |
|                                                                                                             | No  | 3379 (62.9%) | 1389 (37.5%) |                | 796 (64.2%)  | 504 (40.6%) |                |
| “I heard that my friends/families are being vaccinated.”                                                    | Yes | 2370 (44.1%) | 2572 (69.5%) | <0.001         | 502 (40.5%)  | 803 (64.8%) | <0.001         |
|                                                                                                             | No  | 3004 (55.9%) | 1129 (30.5%) |                | 738 (59.5%)  | 437 (35.2%) |                |
| <b>Likert Scale</b>                                                                                         |     |              |              |                |              |             |                |
| <b>Perceived knowledge (source of information)</b>                                                          |     |              |              |                |              |             |                |
| “I feel I get enough information about COVID-19 vaccines and their safety.”                                 |     | 5.1 (1.7)    | 5.1 (1.8)    | 0.36           | 5.2 (1.6)    | 5.0 (1.9)   | 0.002          |
| “The information I receive about COVID-19 vaccines from the vaccine program is reliable and trustworthy.”   |     | 5.3 (1.6)    | 5.0 (1.9)    | <0.001         | 5.3 (1.5)    | 4.9 (1.9)   | <0.001         |
| “I trust the information I receive about COVID-19 vaccines.”                                                |     | 5.2 (1.6)    | 4.1 (2.0)    | <0.001         | 5.3 (1.6)    | 4.1 (2.0)   | <0.001         |
| <b>Perceived severity</b>                                                                                   |     |              |              |                |              |             |                |
| “I think there is a great chance for me to be infected with COVID-19.”                                      |     | 3.3 (2.2)    | 4.5 (1.8)    | <0.001         | 3.6 (2.2)    | 4.5 (1.8)   | <0.001         |
| “I think a COVID-19 infection would be a serious threat to health.”                                         |     | 5.8 (1.6)    | 5.1 (1.9)    | <0.001         | 5.8 (1.6)    | 5.1 (1.8)   | <0.001         |
| <b>Perceived benefits</b>                                                                                   |     |              |              |                |              |             |                |
| “Getting COVID-19 vaccines is a good way to protect myself from COVID-19.”                                  |     | 5.7 (1.5)    | 5.4 (1.9)    | <0.001         | 5.7 (1.4)    | 5.2 (2.0)   | <0.001         |
| “Getting COVID-19 vaccines is a good way to prevent COVID-19 infection spread by patients.”                 |     | 5.5 (1.6)    | 5.4 (1.8)    | <0.001         | 5.6 (1.5)    | 5.3 (1.9)   | <0.001         |
| “Getting COVID-19 vaccines is a good way to protect my friends or families from infected by COVID-19.”      |     | 5.7 (1.4)    | 5.4 (1.8)    | <0.001         | 5.7 (1.4)    | 5.3 (1.9)   | <0.001         |
| <b>Perceived risks and barriers</b>                                                                         |     |              |              |                |              |             |                |
| “I am afraid that COVID-19 vaccine may, in fact, cause me to get infected with COVID-19.”                   |     | 3.9 (2.1)    | 3.0 (2.1)    | <0.001         | 4.1 (2.1)    | 3.2 (2.1)   | <0.001         |

|                                                                                                                                                                     |           |           |        |           |           |        |
|---------------------------------------------------------------------------------------------------------------------------------------------------------------------|-----------|-----------|--------|-----------|-----------|--------|
| “I am concerned that I might have a serious side effect from a shot of COVID-19 vaccine.”                                                                           | 4.5 (1.9) | 4.0 (2.1) | <0.001 | 4.6 (1.8) | 4.2 (2.1) | <0.001 |
| “I am concerned that the production, storage, transportation, and unprofessional injection administration may cause the COVID-19 vaccines to be unsafe for taking.” | 4.5 (1.9) | 3.8 (2.1) | <0.001 | 4.6 (1.9) | 3.9 (2.1) | <0.001 |
| <b>Perceived safety and efficacy of vaccines</b>                                                                                                                    |           |           |        |           |           |        |
| “I am concerned that taking the vaccines might not prevent COVID-19.”                                                                                               | 4.5 (1.8) | 4.0 (2.0) | <0.001 | 4.5 (1.8) | 4.2 (2.0) | <0.001 |
| “It is better to develop immunity by getting vaccinated than by getting infected with COVID-19.”                                                                    | 5.5 (1.5) | 5.0 (2.0) | <0.001 | 5.6 (1.5) | 4.9 (2.1) | <0.001 |
| “I believe the COVID-19 vaccine is safe.”                                                                                                                           | 5.3 (1.5) | 5.0 (1.9) | <0.001 | 5.3 (1.4) | 4.8 (2.0) | <0.001 |
| <b>General attitudes and trust for vaccines</b>                                                                                                                     |           |           |        |           |           |        |
| “In general, prevention is better than cure.”                                                                                                                       | 5.9 (1.4) | 5.4 (1.7) | <0.001 | 5.9 (1.3) | 5.3 (1.7) | <0.001 |
| “In general, vaccination is effective in preventing diseases.”                                                                                                      | 5.7 (1.4) | 5.6 (1.6) | 0.033  | 5.7 (1.3) | 5.5 (1.6) | <0.001 |
| <b>Socio-cultural factors</b>                                                                                                                                       |           |           |        |           |           |        |
| “I am able to openly discuss my concerns about COVID-19 vaccine shots with my doctor.”                                                                              | 5.4 (1.5) | 5.0 (1.9) | <0.001 | 5.4 (1.4) | 4.9 (1.9) | <0.001 |
| “I feel confident that the health center or doctor's office will have the COVID-19 vaccine when I need to take it.”                                                 | 5.5 (1.5) | 5.5 (1.7) | 0.41   | 5.5 (1.5) | 5.4 (1.7) | 0.004  |
| “I trust that my government is making decisions in my best interest with respect to what COVID-19 vaccines are provided.”                                           | 5.4 (1.6) | 4.6 (1.9) | <0.001 | 5.4 (1.6) | 4.5 (1.9) | <0.001 |
| “I think COVID-19 vaccines are more important for boys/men” or “I think COVID-19 vaccines are more important for girls/women.”                                      | 5.7 (1.4) | 4.5 (1.9) | <0.001 | 5.7 (1.4) | 4.4 (2.0) | <0.001 |
| “I decide to take/not to take the COVID-19 vaccine because of religious or cultural reasons.”                                                                       | 4.0 (2.2) | 3.1 (2.1) | <0.001 | 4.2 (2.1) | 3.1 (2.0) | <0.001 |
| “I believe that people are risking their health or the health of the society if they do not take a COVID-19 vaccine.”                                               | 3.4 (2.3) | 2.4 (2.0) | <0.001 | 3.5 (2.3) | 2.5 (2.1) | <0.001 |
| “I think it is important for everyone to get the recommended COVID-19 vaccines for themselves.”                                                                     | 5.3 (1.6) | 4.9 (2.0) | <0.001 | 5.3 (1.6) | 4.7 (2.1) | <0.001 |
| “It’s important for me to spend more than one hour in travel time to get a COVID-19 vaccine.”                                                                       | 5.7 (1.4) | 5.1 (2.0) | <0.001 | 5.7 (1.4) | 4.9 (2.0) | <0.001 |
| “I believe that COVID-19 vaccine producers care about my health more than their profit.”                                                                            | 5.7 (1.5) | 3.6 (2.1) | <0.001 | 5.7 (1.5) | 3.5 (2.2) | <0.001 |

**Table S2. The attributes and levels of vaccine acceptance and preference.**

| Attributes                            | Attributes' description                                                                   | Levels                                                |
|---------------------------------------|-------------------------------------------------------------------------------------------|-------------------------------------------------------|
| Vaccine varieties                     | Different varieties of vaccines developed in different countries                          | mRNA; adenovirus vector vaccines; Inactivated vaccine |
| Adverse effect                        | Extent of adverse effect after getting vaccinated                                         | very mild; mild; moderate                             |
| Efficacy                              | The efficacy of vaccines that protect the vaccinators from getting infected with COVID-19 | 55%; 65%; 75%; 85%; 95%                               |
| Time for the vaccine starting working | Time period from getting vaccinated to the vaccine starts working                         | 5 days; 10 days; 15 days; 20 days                     |
| The duration of vaccine works         | Time period from the vaccines starting to work to its invalidation                        | 5 months; 10 months; 15 months; 20 months             |
| The cost of vaccination               | The cost of whole vaccination process                                                     | \$0; \$50; \$100; \$150; \$200                        |

**Table S3. The Pearson Correlation matrix between the baseline characteristics and acceptance**

[illegible]

|      |                 |        |        |        |        |        |         |         |         |        |        |        |        |        |        |        |        |        |        |        |        |        |        |        |        |        |   |  |  |  |  |  |  |  |  |  |  |
|------|-----------------|--------|--------|--------|--------|--------|---------|---------|---------|--------|--------|--------|--------|--------|--------|--------|--------|--------|--------|--------|--------|--------|--------|--------|--------|--------|---|--|--|--|--|--|--|--|--|--|--|
| (15) | source_social~a | 0.102* | 0.036* | 0.042* | 0.016  | -      | 0.047*  | -0.082* | -0.063* | -0.008 | 0.057* | -      | 0.080* | 0.069* | 0.156* | 1      |        |        |        |        |        |        |        |        |        |        |   |  |  |  |  |  |  |  |  |  |  |
|      |                 |        |        |        | 0.161* |        |         |         |         |        | 0.085* |        |        |        |        |        |        |        |        |        |        |        |        |        |        |        |   |  |  |  |  |  |  |  |  |  |  |
| (16) | source_friend~y | 0.062* | 0.022  | 0.034* | 0.044* | 0.013  | -0.043* | 0.026   | -0.049* | 0.022  | 0.036* | 0.018  | 0.107* | 0.069* | 0.126* | 0.327* | 1      |        |        |        |        |        |        |        |        |        |   |  |  |  |  |  |  |  |  |  |  |
| (17) | source_Employer | -      | 0.026  | 0.027* | -0.022 | -0.011 | 0.061*  | 0.004   | 0.110*  | -      | -      | 0.036* | 0.139* | 0.099* | 0.004  | 0.105* | 0.191* | 1      |        |        |        |        |        |        |        |        |   |  |  |  |  |  |  |  |  |  |  |
|      |                 | 0.075* |        |        |        |        |         |         |         | 0.033* | 0.068* |        |        |        |        |        |        |        |        |        |        |        |        |        |        |        |   |  |  |  |  |  |  |  |  |  |  |
| (18) | source_ad       | 0.097* | 0.033* | 0.023  | -0.018 | 0.022  | -0.033* | 0.001   | -0.059* | 0.036* | 0.069* | 0.026  | 0.210* | 0.160* | 0.092* | 0.179* | 0.226* | 0.291* | 1      |        |        |        |        |        |        |        |   |  |  |  |  |  |  |  |  |  |  |
| (19) | source_other    | -      | -      | -      | -0.011 | -0.001 | 0.009   | 0.063*  | 0.032*  | -      | -      | -0.001 | -      | -      | -      | -      | -      | -0.015 | -0.006 | 1      |        |        |        |        |        |        |   |  |  |  |  |  |  |  |  |  |  |
|      |                 | 0.068* | 0.043* | 0.059* |        |        |         |         |         | 0.028* | 0.033* |        | 0.042* | -0.023 | 0.079* | 0.055* | 0.041* |        |        |        |        |        |        |        |        |        |   |  |  |  |  |  |  |  |  |  |  |
| (20) | delay_vaccine   | 0.284* | 0.122* | 0.133* | 0.004  | 0.058* | -0.098* | -0.018  | -0.122* | 0.267* | 0.231* | -0.004 | -0.002 | 0.029* | 0.076* | -0.017 | -0.022 | -      | 0      | -      | 1      |        |        |        |        |        |   |  |  |  |  |  |  |  |  |  |  |
|      |                 |        |        |        |        |        |         |         |         |        |        |        |        |        |        |        | 0.061* |        | 0.033* |        |        |        |        |        |        |        |   |  |  |  |  |  |  |  |  |  |  |
| (21) | cancel_vaccine  | 0.303* | 0.181* | 0.179* | -0.011 | 0.062* | -0.087* | -0.02   | -0.124* | 0.232* | 0.242* | -0.001 | -0.001 | 0.019  | 0.081* | -0.004 | -0.01  | -      | -0.002 | -      | 0.659* | 1      |        |        |        |        |   |  |  |  |  |  |  |  |  |  |  |
|      |                 |        |        |        |        |        |         |         |         |        |        |        |        |        |        |        | 0.049* |        | 0.056* |        |        |        |        |        |        |        |   |  |  |  |  |  |  |  |  |  |  |
| (22) | discouraging~s  | 0.279* | 0.125* | 0.149* | 0.013  | 0.045* | -0.068* | 0.002   | -0.128* | 0.275* | 0.227* | -0.024 | -0.007 | 0.048* | 0.107* | -0.027 | -0.007 | -      | 0.003  | -      | 0.520* | 0.517* | 1      |        |        |        |   |  |  |  |  |  |  |  |  |  |  |
|      |                 |        |        |        |        |        |         |         |         |        |        |        |        |        |        |        | 0.054* |        | 0.028* |        |        |        |        |        |        |        |   |  |  |  |  |  |  |  |  |  |  |
| (23) | AEFI            | 0.133* | 0.048* | 0.035* | 0.025  | 0.043* | -0.064* | 0.014   | -0.069* | 0.254* | 0.144* | -0.022 | -0.023 | -0.006 | 0.081* | -      | -      | -      | -0.011 | -0.004 | 0.392* | 0.354* | 0.451* | 1      |        |        |   |  |  |  |  |  |  |  |  |  |  |
|      |                 |        |        |        |        |        |         |         |         |        |        |        |        |        |        | 0.051* | 0.032* | 0.072* |        |        |        |        |        |        |        |        |   |  |  |  |  |  |  |  |  |  |  |
| (24) | doctor_recomm~d | 0.203* | -      | -      | 0.045* | -      | -0.104* | -0.015  | -0.148* | 0.165* | 0.209* | -0.008 | -      | -      | 0.033* | 0.02   | -0.013 | -      | -      | 0.021  | 0.133* | 0.094* | 0.135* | 0.196* | 1      |        |   |  |  |  |  |  |  |  |  |  |  |
|      |                 |        | 0.195* | 0.186* |        | 0.045* |         |         |         |        |        |        | 0.128* | 0.111* |        |        |        | 0.063* | 0.029* |        |        |        |        |        |        |        |   |  |  |  |  |  |  |  |  |  |  |
| (25) | local_recommend | 0.249* | -      | -      | 0.030* | -      | -0.109* | -0.026  | -0.159* | 0.149* | 0.244* | 0.006  | -      | -      | 0.025  | 0.027  | -0.007 | -      | -0.023 | 0.008  | 0.139* | 0.116* | 0.126* | 0.178* | 0.744* | 1      |   |  |  |  |  |  |  |  |  |  |  |
|      |                 |        | 0.171* | 0.167* |        | 0.039* |         |         |         |        |        |        | 0.119* | 0.142* |        |        |        | 0.082* |        |        |        |        |        |        |        |        |   |  |  |  |  |  |  |  |  |  |  |
| (26) | ff_vaccinated   | 0.251* | -      | -      | -0.017 | -0.008 | -0.183* | 0.013   | -0.184* | 0.137* | 0.283* | 0.036* | -      | -      | -0.009 | 0.02   | -      | -      | 0.004  | 0.023  | 0.128* | 0.125* | 0.116* | 0.156* | 0.424* | 0.454* | 1 |  |  |  |  |  |  |  |  |  |  |
|      |                 |        | 0.135* | 0.142* |        |        |         |         |         |        |        |        | 0.069* | 0.138* |        |        | 0.063* | 0.071* |        |        |        |        |        |        |        |        |   |  |  |  |  |  |  |  |  |  |  |
